# Supplementary material for: Genetic Insights into Feline Parvovirus: Evaluation of Viral Evolutionary Patterns and Association between Phylogeny and Clinical Variables
Source: MDPI journal article supplement (doi:10.3390/v13061033), 2021-05-30
Supplement: s1 [file s1]

| ACC. NUM.  | STRAIN | HOST               | COLLECTION PLACE | DATE |
|------------|--------|--------------------|------------------|------|
| AB000050.1 | FPV    | <i>Felis catus</i> | JAPAN            | 1996 |
| AB000052.1 | FPV    | <i>Felis catus</i> | JAPAN            | 1996 |
| AB000054.1 | FPV    | <i>Felis catus</i> | JAPAN            | 1996 |
| AB000056.1 | FPV    | <i>Felis catus</i> | JAPAN            | 1996 |
| AB000059.1 | FPV    | <i>Felis catus</i> | JAPAN            | 1996 |
| AB000061.1 | FPV    | <i>Felis catus</i> | JAPAN            | 1996 |
| AB000064.1 | FPV    | <i>Felis catus</i> | JAPAN            | 1996 |
| AB000066.1 | FPV    | <i>Felis catus</i> | JAPAN            | 1996 |
| AB000068.1 | FPV    | <i>Felis catus</i> | JAPAN            | 1996 |
| AB000070.1 | FPV    | <i>Felis catus</i> | JAPAN            | 1996 |
| AB054225.1 | FPV    | <i>Felis catus</i> | JAPAN            | 2001 |
| AB054226.1 | FPV    | <i>Felis catus</i> | JAPAN            | 2001 |
| AB054227.1 | FPV    | <i>Felis catus</i> | JAPAN            | 2001 |
| AB262659.1 | FPV    | <i>Felis catus</i> | JAPAN            | 2006 |
| AJ249556.1 | FPV    | <i>Felis catus</i> | SOUTH AFRICA     | 1997 |
| AY606131.1 | FPV    | <i>Felis catus</i> | FRANCE           | 2004 |
| D88286.1   | FPV    | <i>Felis catus</i> | JAPAN            | 1996 |
| D88287.1   | FPV    | <i>Felis catus</i> | JAPAN            | 1996 |
| EU221278.1 | FPV    | <i>Felis catus</i> | PORTUGAL         | 2005 |
| EU221279.1 | FPV    | <i>Felis catus</i> | PORTUGAL         | 2005 |
| EU221280.1 | FPV    | <i>Felis catus</i> | PORTUGAL         | 2006 |
| EU221281.1 | FPV    | <i>Felis catus</i> | PORTUGAL         | 2006 |
| EU360958.1 | FPV    | <i>Felis catus</i> | HUNGARY          | 2007 |
| EU360959.1 | FPV    | <i>Felis catus</i> | HUNGARY          | 2007 |
| EU498682.1 | FPV    | <i>Felis catus</i> | ITALY            | 2001 |
| EU498683.1 | FPV    | <i>Felis catus</i> | ITALY            | 2002 |
| EU498684.1 | FPV    | <i>Felis catus</i> | ITALY            | 2002 |
| EU498685.1 | FPV    | <i>Felis catus</i> | ITALY            | 2003 |
| EU498686.1 | FPV    | <i>Felis catus</i> | ITALY            | 2003 |
| EU498687.1 | FPV    | <i>Felis catus</i> | ITALY            | 2003 |
| EU498688.1 | FPV    | <i>Felis catus</i> | ITALY            | 2004 |
| EU498689.1 | FPV    | <i>Felis catus</i> | ITALY            | 2004 |
| EU498690.1 | FPV    | <i>Felis catus</i> | ITALY            | 2004 |
| EU498691.1 | FPV    | <i>Felis catus</i> | ITALY            | 2004 |
| EU498692.1 | FPV    | <i>Felis catus</i> | ITALY            | 2004 |
| EU498693.1 | FPV    | <i>Felis catus</i> | ITALY            | 2004 |
| EU498694.1 | FPV    | <i>Felis catus</i> | ITALY            | 2005 |
| EU498695.1 | FPV    | <i>Felis catus</i> | ITALY            | 2005 |
| EU498696.1 | FPV    | <i>Felis catus</i> | ITALY            | 2006 |
| EU498697.1 | FPV    | <i>Felis catus</i> | ITALY            | 2006 |
| EU498698.1 | FPV    | <i>Felis catus</i> | ITALY            | 2006 |
| EU498699.1 | FPV    | <i>Felis catus</i> | ITALY            | 2006 |
| EU498700.1 | FPV    | <i>Felis catus</i> | ITALY            | 2006 |
| EU498701.1 | FPV    | <i>Felis catus</i> | ITALY            | 2006 |
| EU498702.1 | FPV    | <i>Felis catus</i> | ITALY            | 2006 |
| EU498703.1 | FPV    | <i>Felis catus</i> | ITALY            | 2006 |
| EU498704.1 | FPV    | <i>Felis catus</i> | ITALY            | 2006 |
| EU498705.1 | FPV    | <i>Felis catus</i> | ITALY            | 2006 |
| EU498706.1 | FPV    | <i>Felis catus</i> | ITALY            | 2006 |
| EU498707.1 | FPV    | <i>Felis catus</i> | ITALY            | 2006 |
| EU498708.1 | FPV    | <i>Felis catus</i> | ITALY            | 2006 |
| EU498709.1 | FPV    | <i>Felis catus</i> | ITALY            | 2006 |
| EU498710.1 | FPV    | <i>Felis catus</i> | ITALY            | 2006 |
| EU498711.1 | FPV    | <i>Felis catus</i> | ITALY            | 2006 |
| EU498712.1 | FPV    | <i>Felis catus</i> | ITALY            | 2006 |
| EU498713.1 | FPV    | <i>Felis catus</i> | UK               | 2006 |

|            |     |                    |             |      |
|------------|-----|--------------------|-------------|------|
| EU498714.1 | FPV | <i>Felis catus</i> | UK          | 2006 |
| EU498715.1 | FPV | <i>Felis catus</i> | ITALY       | 2006 |
| EU498716.1 | FPV | <i>Felis catus</i> | UK          | 2007 |
| EU498717.1 | FPV | <i>Felis catus</i> | UK          | 2007 |
| EU498718.1 | FPV | <i>Felis catus</i> | ITALY       | 2007 |
| EU498719.1 | FPV | <i>Felis catus</i> | UK          | 2007 |
| EU498720.1 | FPV | <i>Felis catus</i> | ITALY       | 2007 |
| EU659111.1 | FPV | <i>Felis catus</i> | USA         | 1967 |
| EU659112.1 | FPV | <i>Felis catus</i> | USA         | 1964 |
| EU659115.1 | FPV | <i>Felis catus</i> | USA         | 2006 |
| FJ440711.1 | FPV | <i>Felis catus</i> | ARGENTINA   | 2007 |
| FJ440712.1 | FPV | <i>Felis catus</i> | ARGENTINA   | 2007 |
| FJ440713.1 | FPV | <i>Felis catus</i> | ARGENTINA   | 2007 |
| FJ440714.1 | FPV | <i>Felis catus</i> | ARGENTINA   | 2007 |
| FJ936171.1 | FPV | <i>Felis catus</i> | CHINA       | 2008 |
| HQ184189.1 | FPV | <i>Felis catus</i> | SOUTH KOREA | 2008 |
| HQ184190.1 | FPV | <i>Felis catus</i> | SOUTH KOREA | 2008 |
| HQ184191.1 | FPV | <i>Felis catus</i> | SOUTH KOREA | 2008 |
| HQ184192.1 | FPV | <i>Felis catus</i> | SOUTH KOREA | 2008 |
| HQ184193.1 | FPV | <i>Felis catus</i> | SOUTH KOREA | 2008 |
| HQ184194.1 | FPV | <i>Felis catus</i> | SOUTH KOREA | 2008 |
| HQ184195.1 | FPV | <i>Felis catus</i> | SOUTH KOREA | 2008 |
| HQ184196.1 | FPV | <i>Felis catus</i> | SOUTH KOREA | 2008 |
| HQ184197.1 | FPV | <i>Felis catus</i> | SOUTH KOREA | 2008 |
| HQ184198.1 | FPV | <i>Felis catus</i> | SOUTH KOREA | 2008 |
| HQ184199.1 | FPV | <i>Felis catus</i> | SOUTH KOREA | 2008 |
| HQ184200.1 | FPV | <i>Felis catus</i> | SOUTH KOREA | 2008 |
| HQ184201.1 | FPV | <i>Felis catus</i> | SOUTH KOREA | 2008 |
| HQ184202.1 | FPV | <i>Felis catus</i> | SOUTH KOREA | 2008 |
| HQ184203.1 | FPV | <i>Felis catus</i> | SOUTH KOREA | 2008 |
| HQ184204.1 | FPV | <i>Felis catus</i> | SOUTH KOREA | 2008 |
| JX048608.1 | FPV | <i>Felis catus</i> | TAIWAN      | 2011 |
| KC473946.1 | FPV | <i>Felis catus</i> | CHINA       | 2012 |
| KC814179.1 | FPV | <i>Felis catus</i> | CHINA       | 2011 |
| KP090139.1 | FPV | <i>Felis catus</i> | INDIA       | 2014 |
| KP280068.1 | FPV | <i>Felis catus</i> | CHINA       | 2014 |
| KP769859.1 | FPV | <i>Felis catus</i> | BELGIUM     | 2013 |
| KT240128.1 | FPV | <i>Felis catus</i> | PORTUGAL    | 2006 |
| KT240129.1 | FPV | <i>Felis catus</i> | PORTUGAL    | 2007 |
| KT240130.1 | FPV | <i>Felis catus</i> | PORTUGAL    | 2008 |
| KT240131.1 | FPV | <i>Felis catus</i> | PORTUGAL    | 2008 |
| KT240132.1 | FPV | <i>Felis catus</i> | PORTUGAL    | 2012 |
| KT240133.1 | FPV | <i>Felis catus</i> | PORTUGAL    | 2013 |
| KT240134.1 | FPV | <i>Felis catus</i> | PORTUGAL    | 2013 |
| KT240135.1 | FPV | <i>Felis catus</i> | PORTUGAL    | 2014 |
| KT240136.1 | FPV | <i>Felis catus</i> | PORTUGAL    | 2014 |
| KT357494.1 | FPV | <i>Felis catus</i> | THAILAND    | 2014 |
| KU248456.1 | FPV | <i>Felis catus</i> | PORTUGAL    | 2006 |
| KU248457.1 | FPV | <i>Felis catus</i> | PORTUGAL    | 2006 |
| KU248458.1 | FPV | <i>Felis catus</i> | PORTUGAL    | 2006 |
| KU248459.1 | FPV | <i>Felis catus</i> | PORTUGAL    | 2006 |
| KU248460.1 | FPV | <i>Felis catus</i> | PORTUGAL    | 2006 |
| KU248461.1 | FPV | <i>Felis catus</i> | PORTUGAL    | 2006 |
| KU248462.1 | FPV | <i>Felis catus</i> | PORTUGAL    | 2007 |
| KU248463.1 | FPV | <i>Felis catus</i> | PORTUGAL    | 2008 |
| KU248464.1 | FPV | <i>Felis catus</i> | PORTUGAL    | 2014 |
| KX434461   | FPV | <i>Felis catus</i> | ITALY       | 2015 |
| KX434461.1 | FPV | <i>Felis catus</i> | ITALY       | 2015 |

|            |     |                    |        |      |
|------------|-----|--------------------|--------|------|
| KX434462   | FPV | <i>Felis catus</i> | ITALY  | 2015 |
| KX434462.1 | FPV | <i>Felis catus</i> | ITALY  | 2015 |
| KX943310.1 | FPV | <i>Felis catus</i> | ITALY  | 2015 |
| KX943311.1 | FPV | <i>Felis catus</i> | ITALY  | 2015 |
| KX943312.1 | FPV | <i>Felis catus</i> | ITALY  | 2015 |
| KX943313.1 | FPV | <i>Felis catus</i> | ITALY  | 2015 |
| KX943314.1 | FPV | <i>Felis catus</i> | ITALY  | 2015 |
| KX943315.1 | FPV | <i>Felis catus</i> | ITALY  | 2015 |
| KX943316.1 | FPV | <i>Felis catus</i> | ITALY  | 2015 |
| KX943317.1 | FPV | <i>Felis catus</i> | ITALY  | 2015 |
| KX943318.1 | FPV | <i>Felis catus</i> | ITALY  | 2015 |
| KY451727.1 | FPV | <i>Felis catus</i> | CHINA  | 2016 |
| M24002.1   | FPV | <i>Felis catus</i> | USA    | 1988 |
| M24004.1   | FPV | <i>Felis catus</i> | USA    | 1988 |
| MF541119.1 | FPV | <i>Felis catus</i> | CHINA  | 2016 |
| MF541120.1 | FPV | <i>Felis catus</i> | CHINA  | 2016 |
| MF541121.1 | FPV | <i>Felis catus</i> | CHINA  | 2016 |
| MF541122.1 | FPV | <i>Felis catus</i> | CHINA  | 2016 |
| MF541123.1 | FPV | <i>Felis catus</i> | CHINA  | 2017 |
| MF541124.1 | FPV | <i>Felis catus</i> | CHINA  | 2017 |
| MF541125.1 | FPV | <i>Felis catus</i> | CHINA  | 2016 |
| MF541126.1 | FPV | <i>Felis catus</i> | CHINA  | 2017 |
| MF541127.1 | FPV | <i>Felis catus</i> | CHINA  | 2017 |
| MF541128.1 | FPV | <i>Felis catus</i> | CHINA  | 2017 |
| MF541129.1 | FPV | <i>Felis catus</i> | CHINA  | 2017 |
| MF541130.1 | FPV | <i>Felis catus</i> | CHINA  | 2017 |
| MF541131.1 | FPV | <i>Felis catus</i> | CHINA  | 2017 |
| MF541132.1 | FPV | <i>Felis catus</i> | CHINA  | 2017 |
| MF541133.1 | FPV | <i>Felis catus</i> | CHINA  | 2017 |
| MF541134.1 | FPV | <i>Felis catus</i> | CHINA  | 2017 |
| MF541135.1 | FPV | <i>Felis catus</i> | CHINA  | 2017 |
| MF541136.1 | FPV | <i>Felis catus</i> | CHINA  | 2017 |
| MF541137.1 | FPV | <i>Felis catus</i> | CHINA  | 2017 |
| MF541138.1 | FPV | <i>Felis catus</i> | CHINA  | 2017 |
| MF541139.1 | FPV | <i>Felis catus</i> | CHINA  | 2017 |
| MF541140.1 | FPV | <i>Felis catus</i> | CHINA  | 2016 |
| MH165481.1 | FPV | <i>Felis catus</i> | CHINA  | 2015 |
| MH165482.1 | FPV | <i>Felis catus</i> | CHINA  | 2014 |
| MH329286.1 | FPV | <i>Felis catus</i> | CHINA  | 2016 |
| MH496766.1 | FPV | <i>Felis catus</i> | TURKEY | 2017 |
| MH496767.1 | FPV | <i>Felis catus</i> | TURKEY | 2017 |
| MH496768.1 | FPV | <i>Felis catus</i> | TURKEY | 2017 |
| MH496769.1 | FPV | <i>Felis catus</i> | TURKEY | 2017 |
| MH496770.1 | FPV | <i>Felis catus</i> | TURKEY | 2017 |
| MH559110.1 | FPV | <i>Felis catus</i> | INDIA  | 2018 |
| MK266782.1 | FPV | <i>Felis catus</i> | CHINA  | 2017 |
| MK266783.1 | FPV | <i>Felis catus</i> | CHINA  | 2018 |
| MK266784.1 | FPV | <i>Felis catus</i> | CHINA  | 2017 |
| MK266785.1 | FPV | <i>Felis catus</i> | CHINA  | 2017 |
| MK266786.1 | FPV | <i>Felis catus</i> | CHINA  | 2017 |
| MK266787.1 | FPV | <i>Felis catus</i> | CHINA  | 2017 |
| MK266788.1 | FPV | <i>Felis catus</i> | CHINA  | 2017 |
| MK266789.1 | FPV | <i>Felis catus</i> | CHINA  | 2017 |
| MK266790.1 | FPV | <i>Felis catus</i> | CHINA  | 2017 |
| MK266791.1 | FPV | <i>Felis catus</i> | CHINA  | 2017 |
| MK266792.1 | FPV | <i>Felis catus</i> | CHINA  | 2017 |
| MK266793.1 | FPV | <i>Felis catus</i> | CHINA  | 2018 |
| MK266794.1 | FPV | <i>Felis catus</i> | CHINA  | 2018 |

|            |     |                    |           |      |
|------------|-----|--------------------|-----------|------|
| MK266795.1 | FPV | <i>Felis catus</i> | CHINA     | 2018 |
| MK266796.1 | FPV | <i>Felis catus</i> | CHINA     | 2018 |
| MK266797.1 | FPV | <i>Felis catus</i> | CHINA     | 2018 |
| MK266798.1 | FPV | <i>Felis catus</i> | CHINA     | 2017 |
| MK266799.1 | FPV | <i>Felis catus</i> | CHINA     | 2017 |
| MK295775.1 | FPV | <i>Felis catus</i> | CHINA     | 2017 |
| MK413724   | FPV | <i>Felis catus</i> | ITALY     | 2013 |
| MK413724.1 | FPV | <i>Felis catus</i> | ITALY     | 2013 |
| MK413725   | FPV | <i>Felis catus</i> | ITALY     | 2014 |
| MK413725.1 | FPV | <i>Felis catus</i> | ITALY     | 2014 |
| MK413726   | FPV | <i>Felis catus</i> | ITALY     | 2015 |
| MK413726.1 | FPV | <i>Felis catus</i> | ITALY     | 2015 |
| MK413727   | FPV | <i>Felis catus</i> | ITALY     | 2015 |
| MK413727.1 | FPV | <i>Felis catus</i> | ITALY     | 2015 |
| MK413728   | FPV | <i>Felis catus</i> | ITALY     | 2015 |
| MK413728.1 | FPV | <i>Felis catus</i> | ITALY     | 2015 |
| MK413729   | FPV | <i>Felis catus</i> | ITALY     | 2015 |
| MK413729.1 | FPV | <i>Felis catus</i> | ITALY     | 2015 |
| MK413730   | FPV | <i>Felis catus</i> | ITALY     | 2015 |
| MK413730.1 | FPV | <i>Felis catus</i> | ITALY     | 2015 |
| MK413731   | FPV | <i>Felis catus</i> | ITALY     | 2015 |
| MK413731.1 | FPV | <i>Felis catus</i> | ITALY     | 2015 |
| MK413737   | FPV | <i>Felis catus</i> | ITALY     | 2017 |
| MK413737.1 | FPV | <i>Felis catus</i> | ITALY     | 2017 |
| MK413738   | FPV | <i>Felis catus</i> | ITALY     | 2017 |
| MK413738.1 | FPV | <i>Felis catus</i> | ITALY     | 2017 |
| MK425497.1 | FPV | <i>Felis catus</i> | THAILAND  | 2018 |
| MK425498.1 | FPV | <i>Felis catus</i> | THAILAND  | 2018 |
| MK425499.1 | FPV | <i>Felis catus</i> | THAILAND  | 2018 |
| MK425500.1 | FPV | <i>Felis catus</i> | THAILAND  | 2018 |
| MK425501.1 | FPV | <i>Felis catus</i> | THAILAND  | 2018 |
| MK425502.1 | FPV | <i>Felis catus</i> | THAILAND  | 2018 |
| MK425503.1 | FPV | <i>Felis catus</i> | THAILAND  | 2018 |
| MK425504.1 | FPV | <i>Felis catus</i> | THAILAND  | 2018 |
| MK425505.1 | FPV | <i>Felis catus</i> | THAILAND  | 2018 |
| MK425506.1 | FPV | <i>Felis catus</i> | THAILAND  | 2018 |
| MK425507.1 | FPV | <i>Felis catus</i> | THAILAND  | 2018 |
| MK570637.1 | FPV | <i>Felis catus</i> | AUSTRALIA | 2015 |
| MK570638.1 | FPV | <i>Felis catus</i> | AUSTRALIA | 2015 |
| MK570639.1 | FPV | <i>Felis catus</i> | AUSTRALIA | 2015 |
| MK570640.1 | FPV | <i>Felis catus</i> | AUSTRALIA | 2015 |
| MK570641.1 | FPV | <i>Felis catus</i> | AUSTRALIA | 2015 |
| MK570642.1 | FPV | <i>Felis catus</i> | AUSTRALIA | 2015 |
| MK570643.1 | FPV | <i>Felis catus</i> | AUSTRALIA | 2015 |
| MK570644.1 | FPV | <i>Felis catus</i> | AUSTRALIA | 2015 |
| MK570645.1 | FPV | <i>Felis catus</i> | AUSTRALIA | 2015 |
| MK570646.1 | FPV | <i>Felis catus</i> | AUSTRALIA | 2015 |
| MK570647.1 | FPV | <i>Felis catus</i> | AUSTRALIA | 2015 |
| MK570648.1 | FPV | <i>Felis catus</i> | AUSTRALIA | 2016 |
| MK570649.1 | FPV | <i>Felis catus</i> | AUSTRALIA | 2016 |
| MK570650.1 | FPV | <i>Felis catus</i> | AUSTRALIA | 2016 |
| MK570651.1 | FPV | <i>Felis catus</i> | AUSTRALIA | 2016 |
| MK570652.1 | FPV | <i>Felis catus</i> | AUSTRALIA | 2016 |
| MK570653.1 | FPV | <i>Felis catus</i> | AUSTRALIA | 2016 |
| MK570654.1 | FPV | <i>Felis catus</i> | AUSTRALIA | 2017 |
| MK570655.1 | FPV | <i>Felis catus</i> | AUSTRALIA | 2017 |
| MK570656.1 | FPV | <i>Felis catus</i> | AUSTRALIA | 2017 |
| MK570657.1 | FPV | <i>Felis catus</i> | AUSTRALIA | 2017 |

[illegible]

|            |     |                    |                         |      |
|------------|-----|--------------------|-------------------------|------|
| MK570716.1 | FPV | <i>Felis catus</i> | UNITED ARAB<br>EMIRATES | 2017 |
| MK570717.1 | FPV | <i>Felis catus</i> | UNITED ARAB<br>EMIRATES | 2017 |
| MK570718.1 | FPV | <i>Felis catus</i> | UNITED ARAB<br>EMIRATES | 2017 |
| MK570719.1 | FPV | <i>Felis catus</i> | UNITED ARAB<br>EMIRATES | 2017 |
| MK570720.1 | FPV | <i>Felis catus</i> | UNITED ARAB<br>EMIRATES | 2017 |
| MK570721.1 | FPV | <i>Felis catus</i> | UNITED ARAB<br>EMIRATES | 2017 |
| MK570722.1 | FPV | <i>Felis catus</i> | UNITED ARAB<br>EMIRATES | 2017 |
| MK570723.1 | FPV | <i>Felis catus</i> | UNITED ARAB<br>EMIRATES | 2017 |
| MK570724.1 | FPV | <i>Felis catus</i> | UNITED ARAB<br>EMIRATES | 2017 |
| MK570725.1 | FPV | <i>Felis catus</i> | UNITED ARAB<br>EMIRATES | 2017 |
| MK570726.1 | FPV | <i>Felis catus</i> | AUSTRALIA               | 2017 |
| MK570727.1 | FPV | <i>Felis catus</i> | AUSTRALIA               | 2017 |
| MK570728.1 | FPV | <i>Felis catus</i> | AUSTRALIA               | 2016 |
| MK570729.1 | FPV | <i>Felis catus</i> | AUSTRALIA               | 2017 |
| MK570730.1 | FPV | <i>Felis catus</i> | AUSTRALIA               | 2017 |
| MK570731.1 | FPV | <i>Felis catus</i> | AUSTRALIA               | 2017 |
| MK570732.1 | FPV | <i>Felis catus</i> | AUSTRALIA               | 2017 |
| MK570733.1 | FPV | <i>Felis catus</i> | AUSTRALIA               | 2017 |
| MK570734.1 | FPV | <i>Felis catus</i> | AUSTRALIA               | 2017 |
| MK570735.1 | FPV | <i>Felis catus</i> | AUSTRALIA               | 2017 |
| MK570736.1 | FPV | <i>Felis catus</i> | AUSTRALIA               | 2017 |
| MK570737.1 | FPV | <i>Felis catus</i> | AUSTRALIA               | 2017 |
| MK570738.1 | FPV | <i>Felis catus</i> | AUSTRALIA               | 2017 |
| MK570739.1 | FPV | <i>Felis catus</i> | AUSTRALIA               | 2016 |
| MK570740.1 | FPV | <i>Felis catus</i> | AUSTRALIA               | 2016 |
| MK570741.1 | FPV | <i>Felis catus</i> | AUSTRALIA               | 2017 |
| MK570742.1 | FPV | <i>Felis catus</i> | AUSTRALIA               | 2017 |
| MK570743.1 | FPV | <i>Felis catus</i> | AUSTRALIA               | 2017 |
| MK570744.1 | FPV | <i>Felis catus</i> | AUSTRALIA               | 2017 |
| MK570745.1 | FPV | <i>Felis catus</i> | AUSTRALIA               | 2017 |
| MK570746.1 | FPV | <i>Felis catus</i> | AUSTRALIA               | 2017 |
| MK570747.1 | FPV | <i>Felis catus</i> | AUSTRALIA               | 2017 |
| MK570748.1 | FPV | <i>Felis catus</i> | AUSTRALIA               | 2017 |
| MK570749.1 | FPV | <i>Felis catus</i> | AUSTRALIA               | 2016 |
| MK671150.1 | FPV | <i>Felis catus</i> | CHINA                   | 2016 |
| MK671151.1 | FPV | <i>Felis catus</i> | CHINA                   | 2016 |
| MK671152.1 | FPV | <i>Felis catus</i> | CHINA                   | 2016 |
| MK671153.1 | FPV | <i>Felis catus</i> | CHINA                   | 2016 |
| MK671154.1 | FPV | <i>Felis catus</i> | CHINA                   | 2016 |
| MK671155.1 | FPV | <i>Felis catus</i> | CHINA                   | 2016 |
| MK671156.1 | FPV | <i>Felis catus</i> | CHINA                   | 2016 |
| MK671157.1 | FPV | <i>Felis catus</i> | CHINA                   | 2017 |
| MK671158.1 | FPV | <i>Felis catus</i> | CHINA                   | 2017 |
| MK671159.1 | FPV | <i>Felis catus</i> | CHINA                   | 2017 |
| MK671160.1 | FPV | <i>Felis catus</i> | CHINA                   | 2017 |
| MK671161.1 | FPV | <i>Felis catus</i> | CHINA                   | 2017 |
| MK671162.1 | FPV | <i>Felis catus</i> | CHINA                   | 2017 |
| MK671163.1 | FPV | <i>Felis catus</i> | CHINA                   | 2017 |

|            |     |                           |                         |      |
|------------|-----|---------------------------|-------------------------|------|
| MK671164.1 | FPV | <i>Felis catus</i>        | CHINA                   | 2017 |
| MK671165.1 | FPV | <i>Felis catus</i>        | CHINA                   | 2017 |
| MK671166.1 | FPV | <i>Felis catus</i>        | CHINA                   | 2017 |
| MK671167.1 | FPV | <i>Felis catus</i>        | CHINA                   | 2017 |
| MK671168.1 | FPV | <i>Felis catus</i>        | CHINA                   | 2017 |
| MK671169.1 | FPV | <i>Felis catus</i>        | CHINA                   | 2017 |
| MK671170.1 | FPV | <i>Felis catus</i>        | CHINA                   | 2017 |
| MK671171.1 | FPV | <i>Felis catus</i>        | CHINA                   | 2017 |
| MK671172.1 | FPV | <i>Felis catus</i>        | CHINA                   | 2018 |
| MK671173.1 | FPV | <i>Felis catus</i>        | CHINA                   | 2018 |
| MK671174.1 | FPV | <i>Felis catus</i>        | CHINA                   | 2018 |
| MK671175.1 | FPV | <i>Felis catus</i>        | CHINA                   | 2018 |
| MK671176.1 | FPV | <i>Felis catus</i>        | CHINA                   | 2018 |
| MK671177.1 | FPV | <i>Felis catus</i>        | CHINA                   | 2018 |
| MK671178.1 | FPV | <i>Felis catus</i>        | CHINA                   | 2018 |
| MK671179.1 | FPV | <i>Felis catus</i>        | CHINA                   | 2018 |
| MK671180.1 | FPV | <i>Felis catus</i>        | CHINA                   | 2018 |
| MK671181.1 | FPV | <i>Felis catus</i>        | CHINA                   | 2018 |
| MK671182.1 | FPV | <i>Felis catus</i>        | CHINA                   | 2018 |
| MK671183.1 | FPV | <i>Felis catus</i>        | CHINA                   | 2018 |
| MK671184.1 | FPV | <i>Felis catus</i>        | CHINA                   | 2018 |
| MK671185.1 | FPV | <i>Felis catus</i>        | CHINA                   | 2018 |
| MK671186.1 | FPV | <i>Felis catus</i>        | CHINA                   | 2018 |
| MK671187.1 | FPV | <i>Felis catus</i>        | CHINA                   | 2018 |
| MK671188.1 | FPV | <i>Felis catus</i>        | CHINA                   | 2018 |
| MN127779.1 | FPV | <i>Felis catus</i>        | THAILAND                | 2018 |
| MN127780.1 | FPV | <i>Felis catus</i>        | THAILAND                | 2019 |
| MN127781.1 | FPV | <i>Felis catus</i>        | THAILAND                | 2019 |
| MN603975.1 | FPV | <i>Felis catus</i>        | UNITED ARAB<br>EMIRATES | 2017 |
| MN603976.1 | FPV | <i>Felis catus</i>        | AUSTRALIA               | 2010 |
| X55115.1   | FPV | <i>Felis catus</i>        | AUSTRALIA               | 1970 |
| MT274378.1 | FPV | <i>Meles meles</i>        | ITALY                   | 2019 |
| MT274377.1 | FPV | <i>Vulpes vulpes</i>      | ITALY                   | 2017 |
| MN908257.1 | FPV | <i>Panthera tigris</i>    | CHINA                   | 2019 |
| MN862749.1 | FPV | <i>Lontra canadensis</i>  | CANADA                  | 2019 |
| MN862748.1 | FPV | <i>Lontra canadensis</i>  | CANADA                  | 2019 |
| MN862747.1 | FPV | <i>Neovison vison</i>     | CANADA                  | 2019 |
| MN862746.1 | FPV | <i>Neovison vison</i>     | CANADA                  | 2017 |
| MN862745.1 | FPV | <i>Martes americana</i>   | CANADA                  | 2017 |
| MN862744.1 | FPV | <i>Martes americana</i>   | CANADA                  | 2016 |
| MN862743.1 | FPV | <i>Neovison vison</i>     | CANADA                  | 2018 |
| MN451692.1 | FPV | <i>Procyon lotor</i>      | USA                     | 2011 |
| MN451652.1 | FPV | <i>Vulpes lagopus</i>     | FINLAND                 | 1983 |
| MK982094.1 | FPV | <i>Panthera tigris</i>    | CHINA                   | 2017 |
| MH669800.1 | FPV | <i>Prionodon linsang</i>  | THAILAND                | 2015 |
| MG764511.1 | FPV | <i>Panthera leo</i>       | CHINA                   | 2015 |
| MG764510.1 | FPV | <i>Panthera tigris</i>    | CHINA                   | 1999 |
| MF069447.1 | FPV | <i>Procyon lotor</i>      | CANADA                  | 2016 |
| MF069446.1 | FPV | <i>Procyon lotor</i>      | CANADA                  | 2010 |
| MF069445.1 | FPV | <i>Procyon lotor</i>      | CANADA                  | 2015 |
| KX900570.1 | FPV | <i>Panthera onca</i>      | CHINA                   | 1986 |
| KX685354.1 | FPV | <i>Panthera tigris</i>    | CHINA                   | 2016 |
| KT357493.1 | FPV | <i>Viverricula indica</i> | THAILAND                | 2013 |
| KT357492.1 | FPV | <i>Viverricula indica</i> | THAILAND                | 2013 |
| KT357491.1 | FPV | <i>Viverricula indica</i> | THAILAND                | 2013 |
| KP682526.1 | FPV | <i>Martes foina</i>       | SPAIN                   | 2002 |
| KP682520.1 | FPV | <i>Meles meles</i>        | SPAIN                   | 2013 |

|            |     |                            |              |      |
|------------|-----|----------------------------|--------------|------|
| KP033250.1 | FPV | <i>Leptailurus serval</i>  | SOUTH AFRICA | 2014 |
| KP033249.1 | FPV | <i>Acinonyx jubatus</i>    | SOUTH AFRICA | 2014 |
| KP033248.1 | FPV | <i>Acinonyx jubatus</i>    | SOUTH AFRICA | 2014 |
| KP033247.1 | FPV | <i>Acinonyx jubatus</i>    | SOUTH AFRICA | 2014 |
| KP033246.1 | FPV | <i>Acinonyx jubatus</i>    | SOUTH AFRICA | 2014 |
| KP033243.1 | FPV | <i>Leopardus pardalis</i>  | SOUTH AFRICA | 2014 |
| KP033242.1 | FPV | <i>Leptailurus serval</i>  | SOUTH AFRICA | 2014 |
| KP033241.1 | FPV | <i>Panthera leo</i>        | SOUTH AFRICA | 2006 |
| KP033240.1 | FPV | <i>Acinonyx jubatus</i>    | SOUTH AFRICA | 2013 |
| KP033239.1 | FPV | <i>Acinonyx jubatus</i>    | SOUTH AFRICA | 2013 |
| KP033238.1 | FPV | <i>Leptailurus serval</i>  | SOUTH AFRICA | 2013 |
| KP033237.1 | FPV | <i>Acinonyx jubatus</i>    | SOUTH AFRICA | 2012 |
| KP033236.1 | FPV | <i>Acinonyx jubatus</i>    | SOUTH AFRICA | 2012 |
| KP033235.1 | FPV | <i>Acinonyx jubatus</i>    | SOUTH AFRICA | 2012 |
| KP033234.1 | FPV | <i>Acinonyx jubatus</i>    | SOUTH AFRICA | 2012 |
| KP019621.2 | FPV | <i>Viverricula indica</i>  | THAILAND     | 2013 |
| KP019620.1 | FPV | <i>Viverricula indica</i>  | THAILAND     | 2013 |
| KP019619.1 | FPV | <i>Viverricula indica</i>  | THAILAND     | 2013 |
| KP019618.1 | FPV | <i>Viverricula indica</i>  | THAILAND     | 2013 |
| KP019617.1 | FPV | <i>Viverricula indica</i>  | THAILAND     | 2013 |
| KM624023.1 | FPV | <i>Procyon lotor</i>       | USA          | 1978 |
| KJ813895.1 | FPV | <i>Procyon lotor</i>       | USA          | 2012 |
| KJ813894.1 | FPV | <i>Procyon lotor</i>       | USA          | 2012 |
| KJ813893.1 | FPV | <i>Lynx rufus</i>          | USA          | 2013 |
| JX475270.1 | FPV | <i>Procyon lotor</i>       | USA          | 2012 |
| JX475259.1 | FPV | <i>Puma concolor</i>       | USA          | 2010 |
| JX475256.1 | FPV | <i>Puma concolor</i>       | USA          | 2011 |
| JX475254.1 | FPV | <i>Puma concolor</i>       | USA          | 2010 |
| JX475253.1 | FPV | <i>Puma concolor</i>       | USA          | 2010 |
| JX475245.1 | FPV | <i>Puma concolor</i>       | USA          | 2010 |
| JN867596.1 | FPV | <i>Procyon lotor</i>       | USA          | 1978 |
| JN867595.1 | FPV | <i>Procyon lotor</i>       | USA          | 1978 |
| JN867594.1 | FPV | <i>Procyon lotor</i>       | USA          | 1990 |
| JN867593.1 | FPV | <i>Procyon lotor</i>       | USA          | 2010 |
| JF422105.2 | FPV | <i>Herpestes ichneumon</i> | PORTUGAL     | 2009 |

Supplementary table 1: accession numbers of sequences in the international database.
