# Supplementary material for: Genetic Insights into Feline Parvovirus: Evaluation of Viral Evolutionary Patterns and Association between Phylogeny and Clinical Variables
Source: MDPI journal article supplement (doi:10.3390/v13061033), 2021-05-30
Supplement: s1 [file s1]

|                                       |                       |                            |
|---------------------------------------|-----------------------|----------------------------|
| A/G ratio                             | FDP                   | Serum Amylase              |
| ACTH                                  | Fibrinogen            | Serum Amyloid A            |
| Activated partial thromboplastin time | FT3                   | Serum Anion Gap            |
| Age                                   | FT4                   | Serum AST                  |
| Albumin %                             | Gamma-globulins       | Serum BCHE                 |
| Aldosterone                           | GGT/Crea              | Serum Ca x Pi              |
| Alpha-1-globulins                     | Glucose/Crea          | Serum Calcium              |
| Alpha-2-globulins                     | HB                    | Serum Chloride             |
| Ammonia/Crea                          | HCT                   | Serum Cholesterol          |
| Ammonium                              | HDW                   | Serum CK                   |
| Amylase/Crea                          | Hospitalization time  | Serum Creatinine           |
| Antithrombin                          | Housing               | Serum GGT                  |
| Basophils                             | HPT                   | Serum Globulins            |
| Beta-1-globulins                      | Lipase/Crea           | Serum Glucose              |
| Beta-2-globulins                      | Lymphocytes           | Serum Haptoglobin          |
| Beta-3-globulins                      | MCHC                  | Serum Iron                 |
| Beta-globulins                        | MCHC/CHCM             | Serum LDH                  |
| Bile Acids/Crea                       | MCV                   | Serum Lipase               |
| Bilirubin/Crea                        | Monocytes             | Serum Magnesium            |
| Blood Pressure (MAX)                  | MPC                   | Serum Measured Osmolality  |
| Blood Pressure (MEAN)                 | MPM                   | Serum Na/K                 |
| Blood Pressure (MIN)                  | MPV                   | Serum Osmolal Gap          |
| Body Condition Score                  | Neutrophils           | Serum Phosphate            |
| Body weight                           | Osmolal Gap           | Serum PON-1                |
| Breed                                 | Osmolality            | Serum Potassium            |
| Calcium/Crea                          | Patient status        | Serum Sodium               |
| Calculated Osmolality                 | PCDW                  | Serum TIBC                 |
| CH                                    | PCT                   | Serum Tonicity             |
| CHCM                                  | PDW                   | Serum Total Bilirubin      |
| CHDW                                  | pH                    | Serum Total Carbon Dioxide |
| Chloride/Crea                         | Plasma Lactate        | Serum Total Protein        |
| Cortisol                              | PLT                   | Serum Triglycerides        |
| Cortisol/Creatinuria                  | PMDW                  | Serum UIBC                 |
| Creatinine                            | Potassium/Crea        | Serum Urea                 |
| Creatinuria                           | Prothrombin Time (PT) | Sex                        |
| Death                                 | PU/CU                 | Sexual status              |
| DGGR-lipase                           | Pulse rate            | Sodium/Crea                |
| DHEA                                  | Quantitative FDP      | Specific gravity           |
| Diet                                  | RBC                   | Temperature                |
| EF Calcium                            | RDW                   | Time of death              |
| EF Chloride                           | Respiratory Rate      | TSH                        |
| EF Posphate                           | Saturation            | TT4                        |
| EF Potassium                          | Serum A/G             | TTKG                       |
| EF Sodium                             | Serum Albumin         | Vaccinations               |
| EF Urea                               | Serum ALP             | WBC                        |
| Eosinophils                           | Serum ALT             |                            |

**Supplementary table 2:** list of clinical variables considered in the study.
