# Supplementary material for: Genetic Insights into Feline Parvovirus: Evaluation of Viral Evolutionary Patterns and Association between Phylogeny and Clinical Variables
Source: MDPI journal article supplement (doi:10.3390/v13061033), 2021-05-30
Supplement: s1 [file s1]

| Clinical variable                            | Cmean                | p-value            |
|----------------------------------------------|----------------------|--------------------|
| MPC                                          | 0.208166880926768    | 0.010989010989011  |
| TT4                                          | 0.201842183251493    | 0.018981018981019  |
| FT4                                          | 0.16616365927182     | 0.036963036963037  |
| Serum Calcium                                | 0.141442466269733    | 0.045954045954046  |
| Serum AST                                    | 0.121647305720535    | 0.04995004995005   |
| MPM                                          | 0.145456484613027    | 0.0559440559440559 |
| PCT                                          | 0.120613015232448    | 0.0609390609390609 |
| Serum Anion Gap                              | 0.124232778292131    | 0.0679320679320679 |
| FDP                                          | 0.117513481735115    | 0.0689310689310689 |
| Serum Total Protein                          | 0.113619556228564    | 0.0829170829170829 |
| PLT                                          | 0.111289590774363    | 0.0889110889110889 |
| RDW                                          | 0.115249410202735    | 0.102897102897103  |
| PDW                                          | 0.0929059716450843   | 0.103896103896104  |
| Prothrombin Time (PT)                        | 0.0731140390145689   | 0.124875124875125  |
| Serum Glucose                                | 0.0731110218225893   | 0.134865134865135  |
| FT3                                          | -0.00966458976863443 | 0.13986013986014   |
| Plasma Lactate                               | 0.0815960140323062   | 0.144855144855145  |
| Serum Globulins                              | 0.0766381222289164   | 0.15984015984016   |
| Serum Triglycerides                          | 0.0401040617745541   | 0.162837162837163  |
| Serum ALT                                    | 0.0365046264846605   | 0.193806193806194  |
| Serum Amyloid A                              | 0.0645363867334716   | 0.195804195804196  |
| Serum Chloride                               | 0.0637583107510727   | 0.205794205794206  |
| Serum Haptoglobin                            | 0.0617916606472676   | 0.21978021978022   |
| Bilirubin/Crea                               | 0.0457493651430743   | 0.228771228771229  |
| Serum TIBC                                   | 0.0509760376788592   | 0.231768231768232  |
| Gamma-globulins                              | 0.0370884898612331   | 0.262737262737263  |
| Respiratory Rate                             | 0.0243412798066781   | 0.287712287712288  |
| Lymphocytes                                  | 0.0204471483786648   | 0.303696303696304  |
| WBC                                          | 0.00634463879555399  | 0.322677322677323  |
| Neutrophils                                  | -0.00447748283898707 | 0.33966033966034   |
| Serum Sodium                                 | 0.0148742553188903   | 0.345654345654346  |
| Serum PON-1                                  | 0.0123099778353257   | 0.360639360639361  |
| Monocytes                                    | -0.0109884335652999  | 0.375624375624376  |
| Basophils                                    | -0.02575116909475    | 0.411588411588412  |
| Eosinophils                                  | -0.0264709030102236  | 0.441558441558442  |
| Beta-globulins                               | -0.0106573564897357  | 0.446553446553447  |
| TSH                                          | -0.0266062476745689  | 0.452547452547453  |
| Serum Amylase                                | -0.0181001280340403  | 0.466533466533467  |
| Activated Partial Thromboplastin Time (aPTT) | -0.0309818271393027  | 0.485514485514486  |
| Serum Lipase                                 | -0.032030630478711   | 0.522477522477522  |
| Serum CK                                     | -0.0372827426548352  | 0.55044955044955   |
| Body Condition Score                         | -0.0340138129732091  | 0.58041958041958   |
| Serum GGT                                    | -0.0690284305550033  | 0.717282717282717  |
| Blood Pressure (MAX)                         | -0.0908907600791137  | 0.762237762237762  |
| HCT                                          | -0.0826410102827217  | 0.77022977022977   |
| HB                                           | -0.122827818684888   | 0.862137862137862  |
| MCV                                          | -0.169010992616038   | 0.938061938061938  |

**Supplementary table 3:** summary of variable statistical association with phylogenetic structure. For each variable the calculated Cmean and the respective p-value are reported.
