# Supplementary figures and images for: Genetic Insights into Feline Parvovirus: Evaluation of Viral Evolutionary Patterns and Association between Phylogeny and Clinical Variables
Source: MDPI journal article supplement (doi:10.3390/v13061033), 2021-05-30

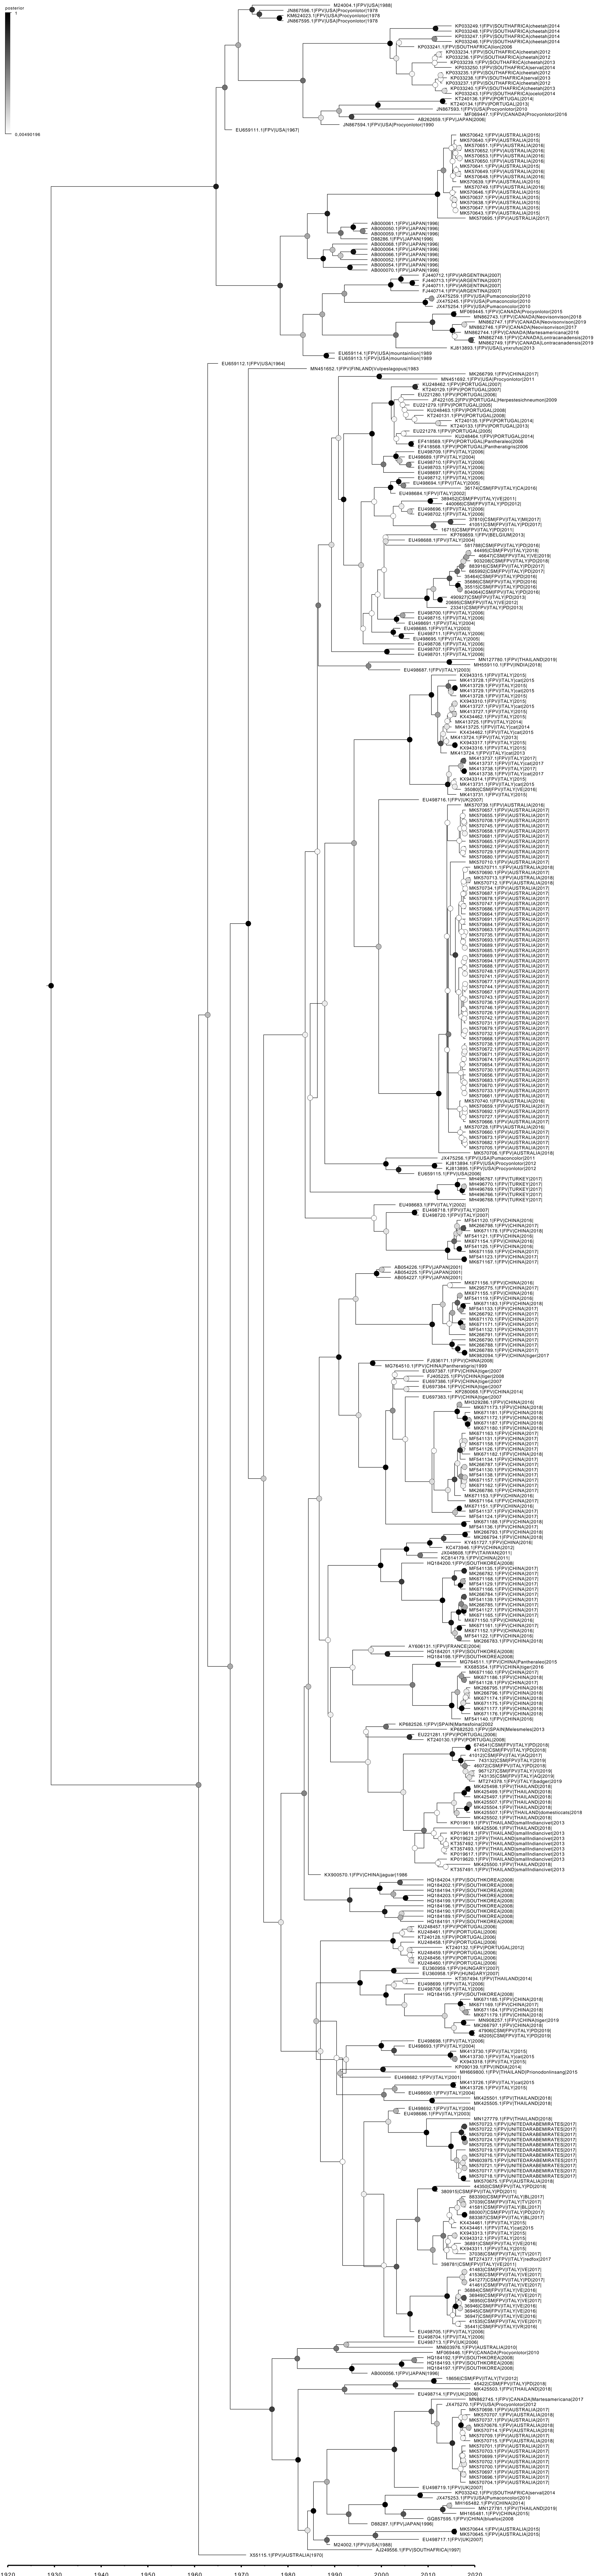

Supplement: s1 [file s1]

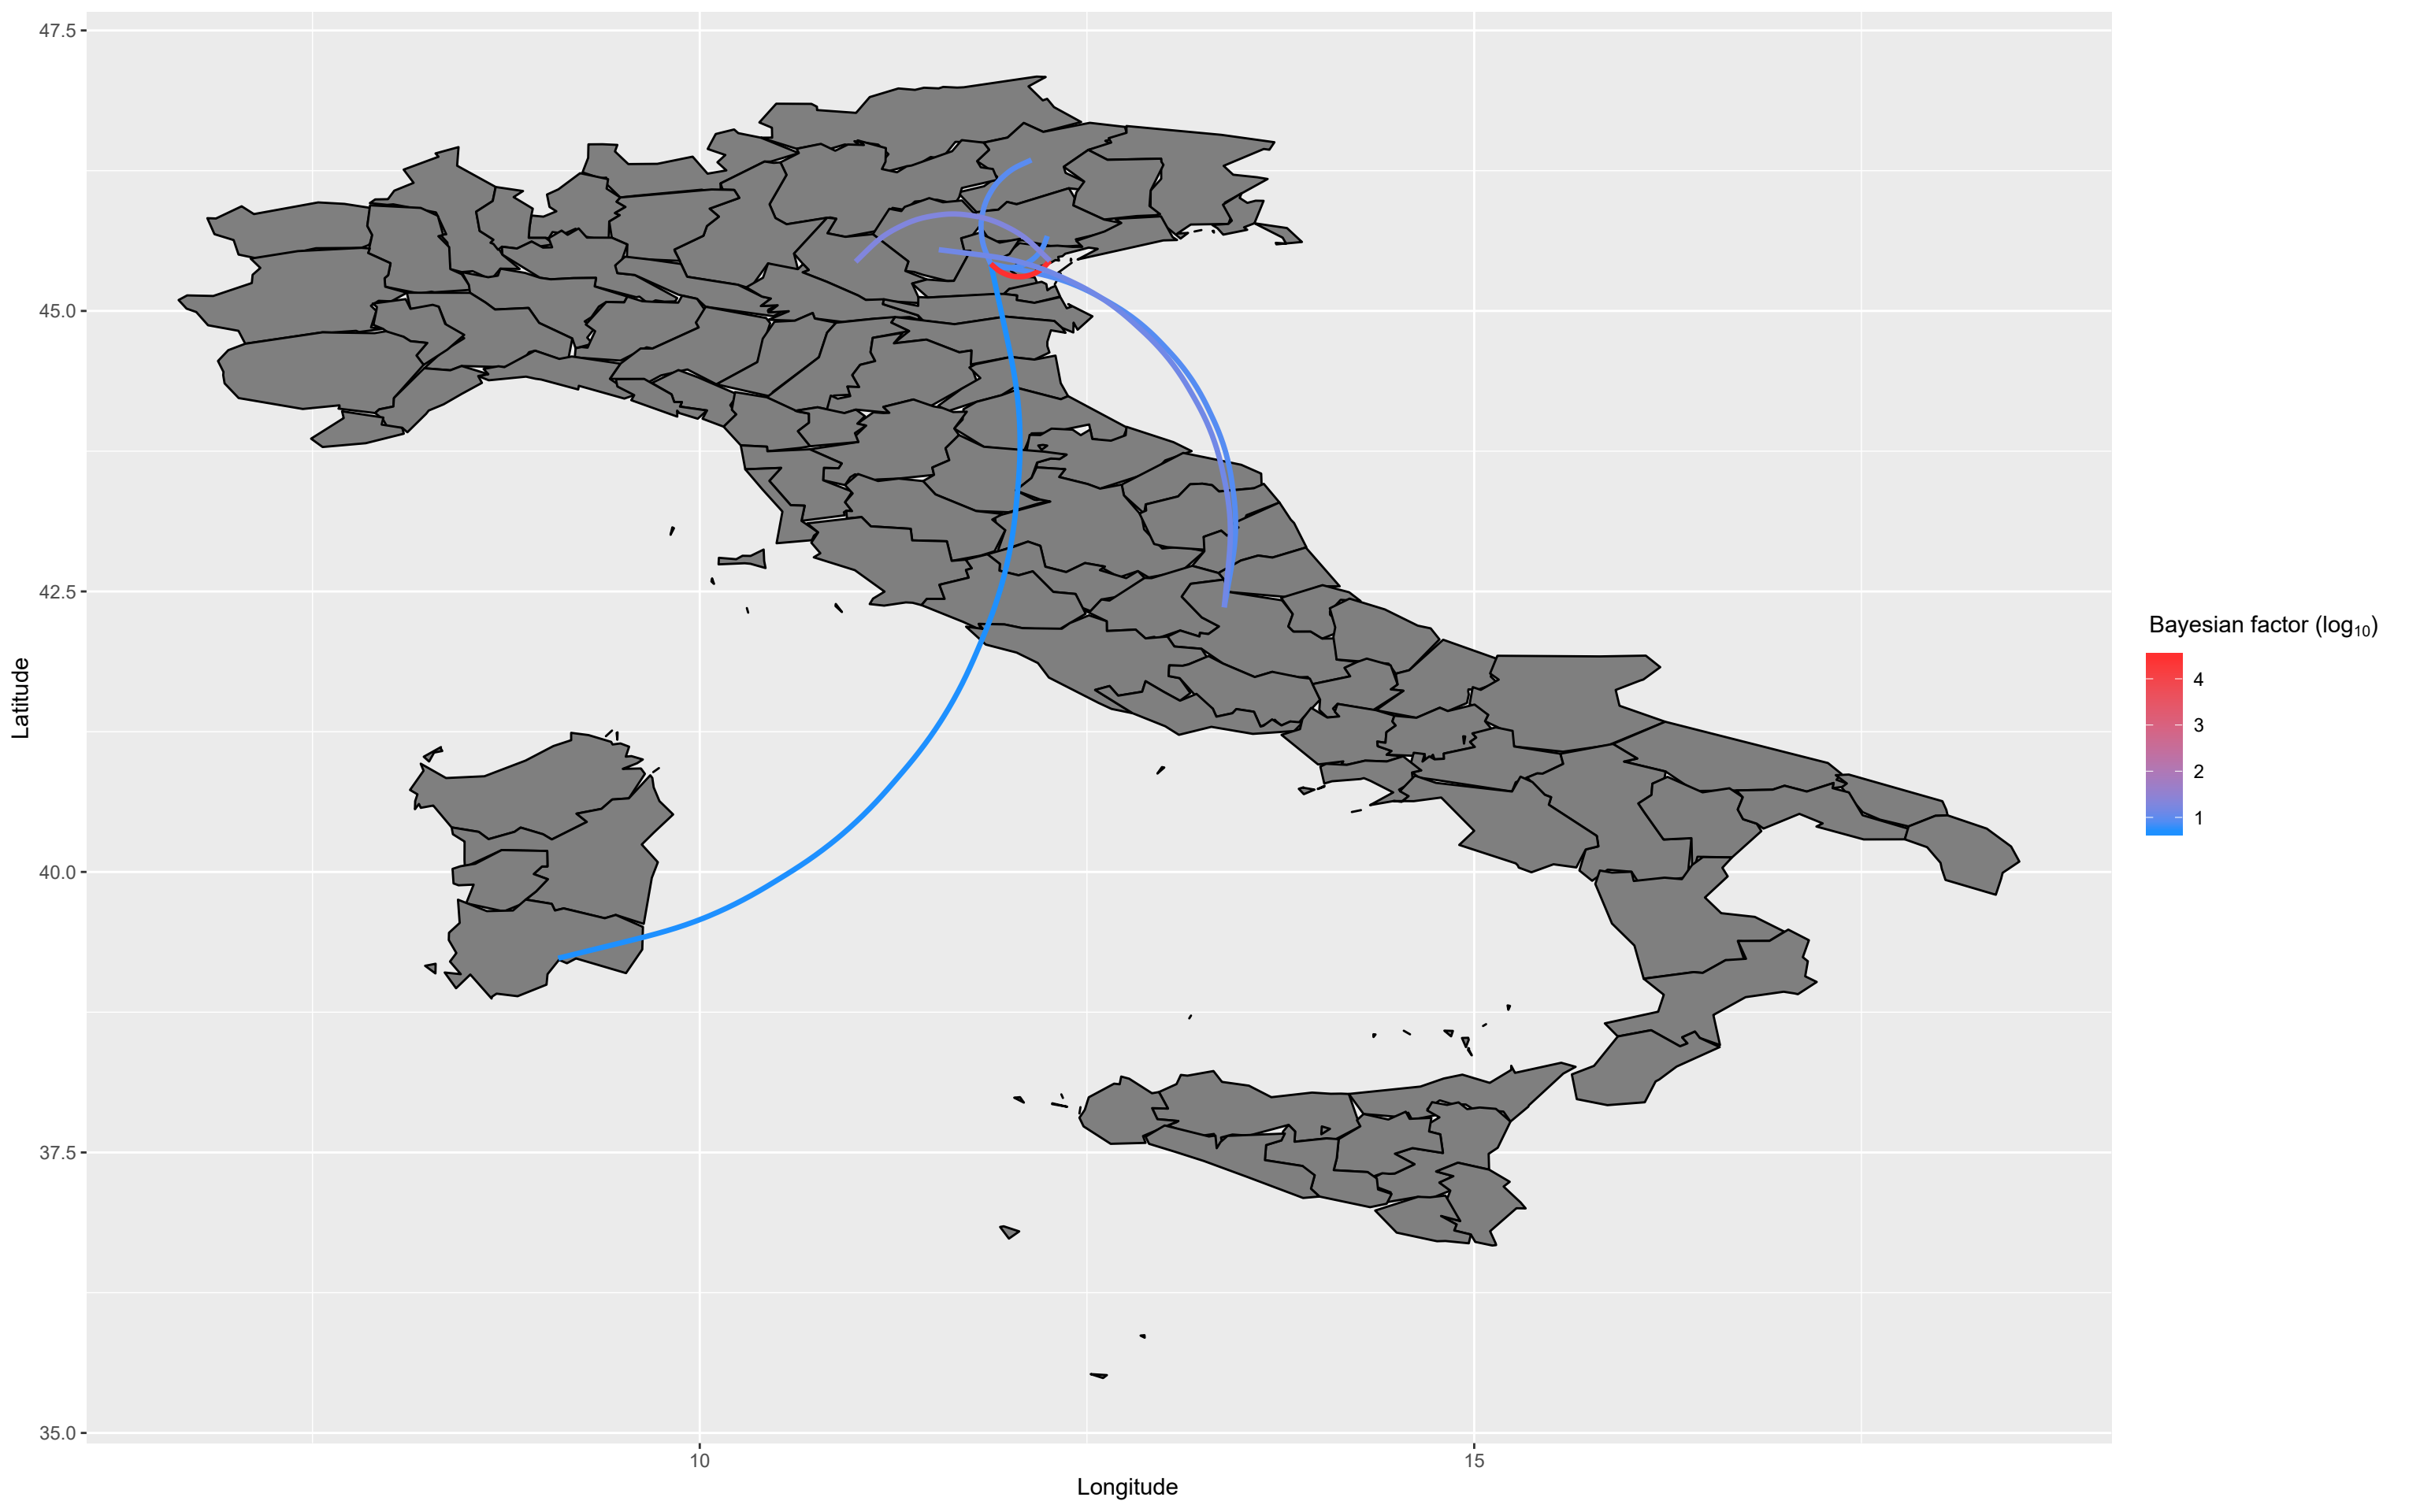

Supplement: s1 [file s1]
